# Supplementary material for: A Targeted and an Untargeted Metabolomics Approach to the Volatile Aroma Profile of Young ‘Maraština’ Wines
Source: MDPI journal article supplement (doi:10.3390/metabo12121295), 2022-12-19
Supplement: s1 [file s1]

**Table S2:** Climate data obtained from the Croatian Meteorological and Hydrological Service in the period from January 2021 to September 2021 and represented the average value of four vineyards for the Northern Dalmatia subregion and six vineyards for the Central and Southern Dalmatia subregion.

| Vine-growing subregion               | Month     | Tav (°C) | Tmin (°C) | Tmax (°C) | Mp (mm) | Ms (h) |
|--------------------------------------|-----------|----------|-----------|-----------|---------|--------|
| <b>Northern Dalmatia</b>             | January   | 7        | 3         | 10        | 145     | 95     |
|                                      | February  | 9        | 5         | 13        | 45      | 126    |
|                                      | March     | 10       | 5         | 15        | 15      | 249    |
|                                      | April     | 12       | 7         | 16        | 50      | 250    |
|                                      | May       | 17       | 12        | 22        | 19      | 291    |
|                                      | June      | 24       | 18        | 29        | 3       | 365    |
|                                      | July      | 26       | 20        | 31        | 40      | 334    |
|                                      | August    | 25       | 19        | 30        | 29      | 333    |
|                                      | September | 22       | 16        | 27        | 51      | 281    |
| <b>Central and Southern Dalmatia</b> | January   | 8        | 5         | 11        | 128     | 92     |
|                                      | February  | 10       | 6         | 14        | 50      | 152    |
|                                      | March     | 10       | 6         | 14        | 29      | 238    |
|                                      | April     | 13       | 8         | 17        | 42      | 228    |
|                                      | May       | 19       | 14        | 23        | 66      | 283    |
|                                      | June      | 25       | 19        | 30        | 5       | 347    |
|                                      | July      | 28       | 22        | 33        | 10      | 349    |
|                                      | August    | 27       | 22        | 32        | 94      | 342    |
|                                      | September | 22       | 17        | 27        | 24      | 290    |

Tav- average temperature, Tmin-average minimum temperature, Tmax-average maximum temperature, Mp-average precipitation, Ms-average hours of sunshine.
