# Supplementary material for: A Targeted and an Untargeted Metabolomics Approach to the Volatile Aroma Profile of Young ‘Maraština’ Wines
Source: MDPI journal article supplement (doi:10.3390/metabo12121295), 2022-12-19
Supplement: s1 [file s1]

**Table S1.** General vineyard parameters.

| Vineyard                                                         | Geographical position        | Altitude (m) | Vine-growing subregion        | Meteorological station | Plantation year | Soil type       | Row distance x vine, m | Trellis system   | Row orientation |
|------------------------------------------------------------------|------------------------------|--------------|-------------------------------|------------------------|-----------------|-----------------|------------------------|------------------|-----------------|
| <b>Institute for Adriatic Crops and Karst Reclamation, Split</b> | 43°30'35" N, 16°29'85" E     | 14           | Central and Southern Dalmatia | Split                  | 2005            | brown           | 2.0 x 1.0              | bilateral cordon | north-south     |
| <b>Dračevica (Korčula)</b>                                       | 42°55'36" N, 16° 54' 0" E    | 62           | Central and Southern Dalmatia | Vela Luka (Korčula)    | 1941            | brown           | 1.5 x 1.2              | bilateral cordon | north-south     |
| <b>Prapatna 1 (Korčula)</b>                                      | 42°54'51" N, 16°54'58" E     | 40           | Central and Southern Dalmatia | Vela Luka (Korčula)    | 2000            | brown-redish    | 1.8 x 1.0              | bilateral cordon | north-south     |
| <b>Prapatna 2 (Korčula)</b>                                      | 42° 54' 50" N, 16° 54' 52" E | 40           | Central and Southern Dalmatia | Vela Luka (Korčula)    | 2008            | brown           | 1.2 x 1.0              | bilateral cordon | north-south     |
| <b>Kruševo (Korčula)</b>                                         | 42° 55' 20" N, 16° 53' 54" E | 68           | Central and Southern Dalmatia | Vela Luka (Korčula)    | 1999            | brown-redish    | 1.8 x 1.0              | bilateral cordon | north-south     |
| <b>Kaštela (Kaštel Kambelovac)</b>                               | 43° 33' 34" N, 16° 22' 32" E | 94           | Central and Southern Dalmatia | Split                  | 2011            | brown-redish    | 1.6 x 0.9              | bilateral cordon | north-south     |
| <b>Smilčić</b>                                                   | 44° 7' 23" N, 15° 28' 52" E  | 60           | Northern Dalmatia             | Zadar                  | 2009            | brown           | 2.6 x 1.0              | bilateral cordon | north-south     |
| <b>Nadin (Polača)</b>                                            | 44° 0' 28" N, 15° 29' 41" E  | 103          | Northern Dalmatia             | Benkovac               | 2010            | reclaimed karst | 2.2 x 1.1              | bilateral cordon | north-south     |
| <b>Stankovci</b>                                                 | 43° 57' 20" N, 15° 43' 6" E  | 130          | Northern Dalmatia             | Benkovac               | 2008            | brown           | 1.9 x 1.0              | bilateral cordon | north-south     |
| <b>Vukšić</b>                                                    | 43° 56' 37" N, 15° 43' 46" E | 130          | Northern Dalmatia             | Benkovac               | 2003            | brown           | 2.0 x 1.0              | bilateral cordon | north-south     |
