# Supplementary material for: A Targeted and an Untargeted Metabolomics Approach to the Volatile Aroma Profile of Young ‘Maraština’ Wines
Source: MDPI journal article supplement (doi:10.3390/metabo12121295), 2022-12-19
Supplement: s1 [file s1]

**Table S3.** Odor activity value (OAV) of the main odorants in young Maraština wines quantified by gas chromatography-mass spectrometry (GC-MS/MS) in Central and Southern Dalmatia and Northern Dalmatia subregions.

| No. | Volatile compound      | Concentration (µg/L) |         | ODT (µg/L)* | Odor descriptor*      | OAV |     |
|-----|------------------------|----------------------|---------|-------------|-----------------------|-----|-----|
|     |                        | ND                   | CSD     |             |                       | ND  | CSD |
| 1   | $\beta$ -Damascenone   | 1.89                 | 0.84    | 0.05        | honey,prunes          | 38  | 17  |
| 2   | Ethyl caprylate        | 221.09               | 176.73  | 5           | fruity, sweet         | 44  | 35  |
| 3   | Ethyl isovalerate      | 11.06                | 8.02    | 3           | fruity, lemon         | 4   | 3   |
| 4   | Ethyl 2-methylbutyrate | 7.55                 | 5.39    | 1           | apple, strawberry     | 7   | 5   |
| 5   | Ethyl caproate         | 178.75               | 161.34  | 14          | green,apple,fruity    | 13  | 11  |
| 6   | Isopentyl acetate      | 491.93               | 579.53  | 30          | banana                | 16  | 19  |
| 7   | Ethyl butyrate         | 67.10                | 66.89   | 20          | buttery               | 3   | 3   |
| 8   | 4-Vinylguaiaicol       | 155.17               | 271.54  | 40          | spicy, clove, curry   | 4   | 7   |
| 9   | Phenylacetaldehyde     | 39.96                | 31.85   | 4           | honey                 | 10  | 8   |
| 10  | Octanoic acid          | 2453.81              | 2083.90 | 500         | fatty, cheese, rancid | 5   | 4   |

ODT-odor thresholds; ND- Northern Dalmatia subregion; CSD- Central and Southern Dalmatia subregion. The OAV calculates as quotients of concentration of a specific compound and the corresponding odor detection threshold from the literature

\*Odor thresholds (µg/L) and odor descriptors reported in the literature [32,34,36,41,43,53].
